# Supplementary material
Source: PubMed Central journal article supplement (PMC5538274)
Supplement: 10.1194_M072611_jlr.M072611-1.pdf [file 10.1194_M072611_jlr.M072611-1.pdf]

## SUPPLEMENTAL INFORMATION

### **Jaspine B induces non apoptotic cell death in gastric cancer cells independently of its inhibition of ceramide synthase**

Francesca Cingolani<sup>1,&#</sup>, Fabio Simbari<sup>1</sup>, Jose Luis Abad<sup>1</sup>, Mireia Casasampere<sup>1</sup>, Gemma Fabrias<sup>1</sup>, Anthony H. Futerman<sup>2</sup>, Josefina Casas<sup>1#</sup>

<sup>1</sup> Research Unit on BioActive Molecules (RUBAM), Department of Biomedical Chemistry, Institute for Advanced Chemistry of Catalonia (IQAC-CSIC), 08034 Barcelona, Spain. <sup>2</sup>Department of Biological Chemistry, Weizmann Institute of Science, Rehovot, Israel.

Running title: Biological effect of Jaspine B in cancer cells

& Current address: Division of Digestive Diseases, Department of Medicine, Emory University School of Medicine, Atlanta, GA.

# Corresponding authors: Josefina Casas (fina.casas@iqac.csic.es) and Francesca Cingolani (fcingol@emory.edu)

# Address correspondence to Josefina Casas, Department of Biomedical Chemistry. IQAC-CSIC. Jordi Girona 18, 08034-Barcelona, Spain. Tel. (+34)-934 006 115; FAX (+34)932 045 904. E-mail: [fina.casas@iqac.csic.es](mailto:fina.casas@iqac.csic.es).

## LIST OF SUPPLEMENTAL DATA

|                                                                                                                                  |     |
|----------------------------------------------------------------------------------------------------------------------------------|-----|
| Supplemental Figure S1. <i>N</i> -octanoyl-JB (C <sub>8</sub> -JB) and <i>N</i> -hexadecanoyl-JB (C <sub>16</sub> -JB) synthesis | S-2 |
| Supplemental Figure S2. Effect of JB on cancer cell viability                                                                    | S-3 |
| Supplemental Figure S3. CerS6 inhibition by JB, JB stereoisomers, acyl-JB and N3-JB                                              | S-4 |
| Supplemental Figure S4. Jaspine B does not inhibit Des1                                                                          | S-5 |
| Supplemental Figure S5. JB induces cell vacuolation in various cancer cells                                                      | S-6 |
| Supplemental Figure S6. JB does not induce cell vacuolation in HEK293T cells                                                     | S-7 |
| Supplemental Figure S7. FB1 does not induce cell vacuolation in HGC-27 cells                                                     | S-8 |
| Supplemental Experimental Procedure                                                                                              | S-9 |

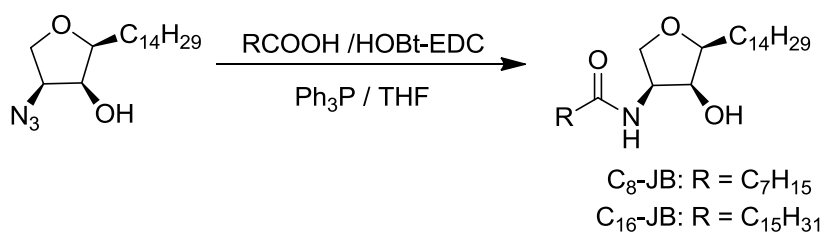

Supplemental Figure S1. *N*-octanoyl-JB ( $\text{C}_8\text{-JB}$ ) and *N*-hexadecanoyl-JB ( $\text{C}_{16}\text{-JB}$ ) synthesis (Van den Berg RJBHN, Boltje TJ, Verhagen CP, Litjens REJN, van der Marel GA, Overkleeft HS. 2006. An efficient synthesis of the natural tetrahydrofuran pachastrissamine starting from *D*-ribo-phytosphingosine. *J Org Chem.* **71**:836–839.)

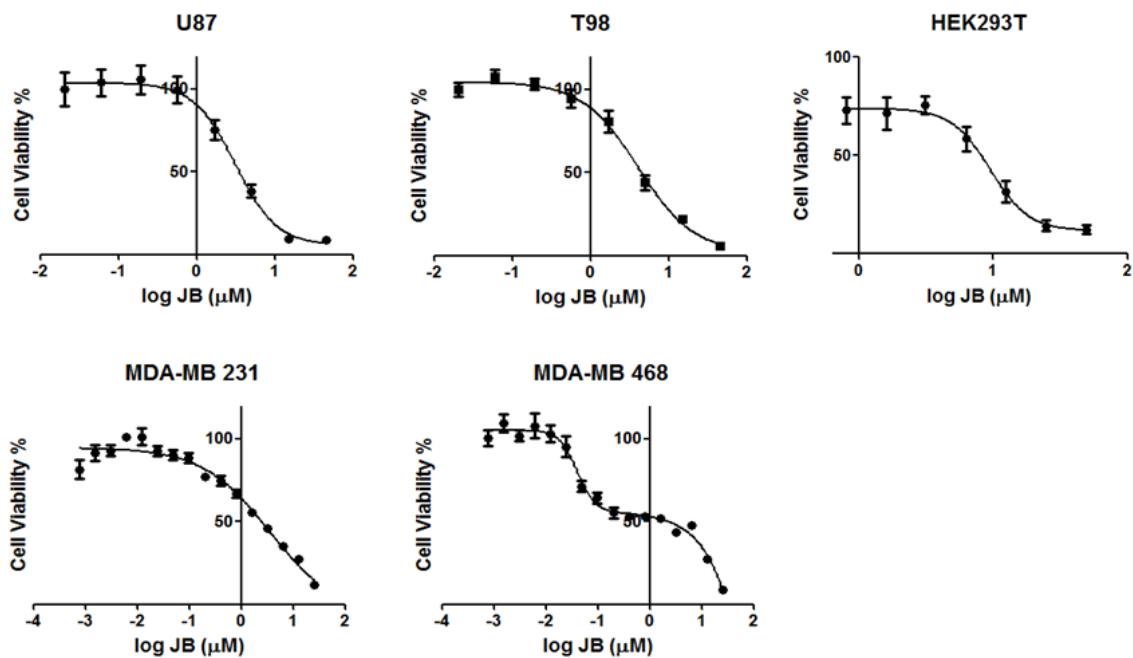

Supplemental Figure S2. Effect of JB on cell viability. U87, T98, MDA-MB-231, MDA-MB-468 and HEK293T cells were incubated with different concentrations of JB or ethanol ( $\leq 0.25\%$ ) for 24 h. Viability was determined by MTT assay, and expressed as a percentage of the control value. Data are means  $\pm$ SD of 2-3 independent experiments performed in triplicate.

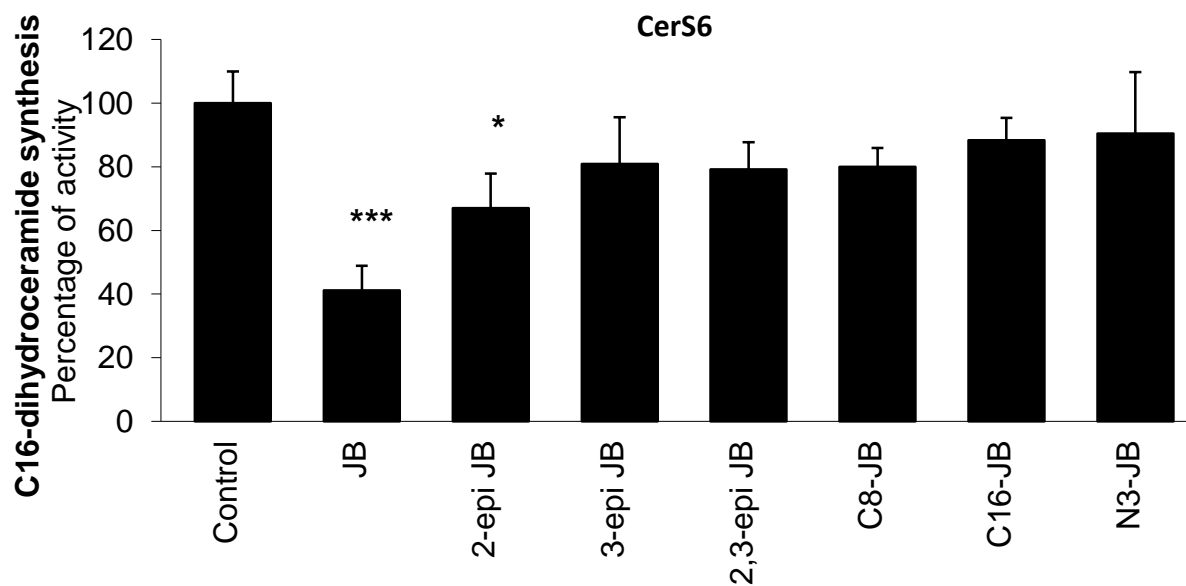

Supplemental Figure S3. CerS6 inhibition by JB, JB stereoisomers, acyl-JB and N3-JB. Cell lysates were incubated with the indicated compounds (5 $\mu$ M) or ethanol for 5 minutes and then incubated for 10 minutes with NBD-Sa. Lipids were extracted and NBD-dhCer was separated by TLC. Results are means  $\pm$  SD of two experiments in duplicates (\*,  $p < 0.05$ ; \*\*\* $p < 0.001$ , t test)

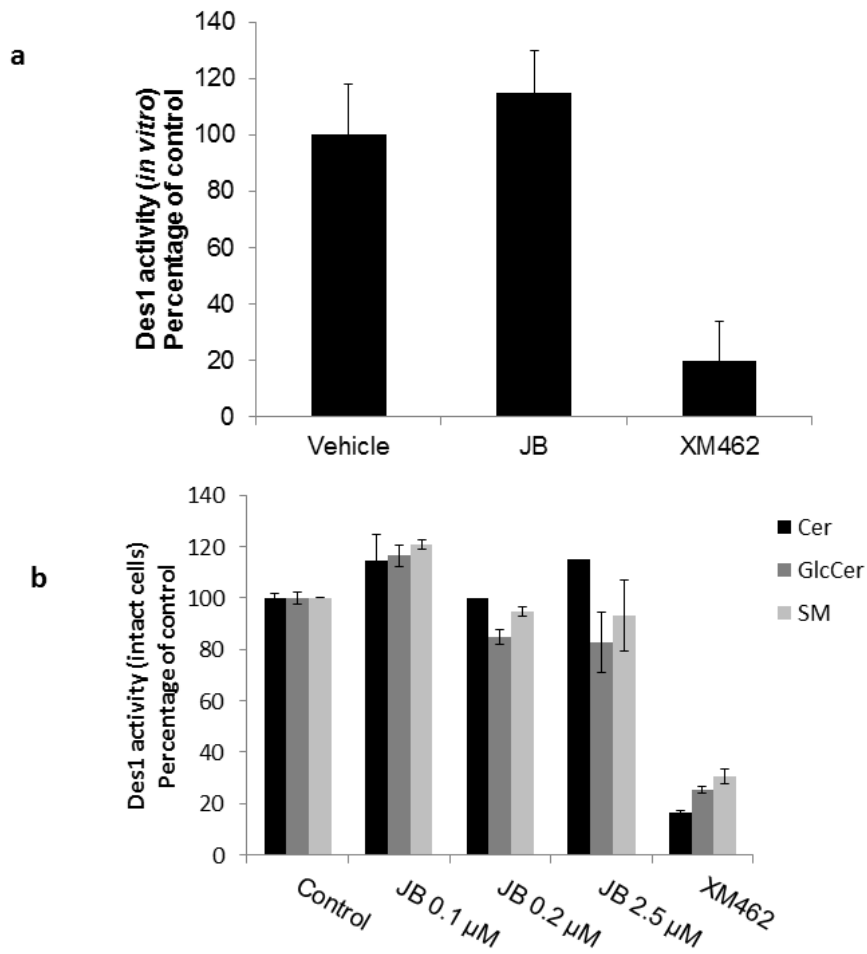

Supplemental Figure S4. Jaspine B does not inhibit Des1. (a) HGC-27 cell lysates were incubated with equimolar amount of JB and dhCer-C6-NBD (10 μM). Samples were processed and analyzed as detailed in the Supplementary Materials and Methods section. Data are means ± SD of three independent experiments performed in triplicate. (b) HGC-27 cells were incubated with DHCer-C6-NBD (10 μM) and Jaspine B for 4 hours and *Des1* activity was calculated as detailed in the Supplementary Materials and Methods section. Data are means ± SD of one representative experiment with triplicates. In both intact and cell lysates experiments XM462 (8 μM) was included as a positive control. Cer: Ceramide-C6-NBD, GlcCer: Glucosylceramide-C6-NBD, SM: Sphingomyelin-C6-NBD.

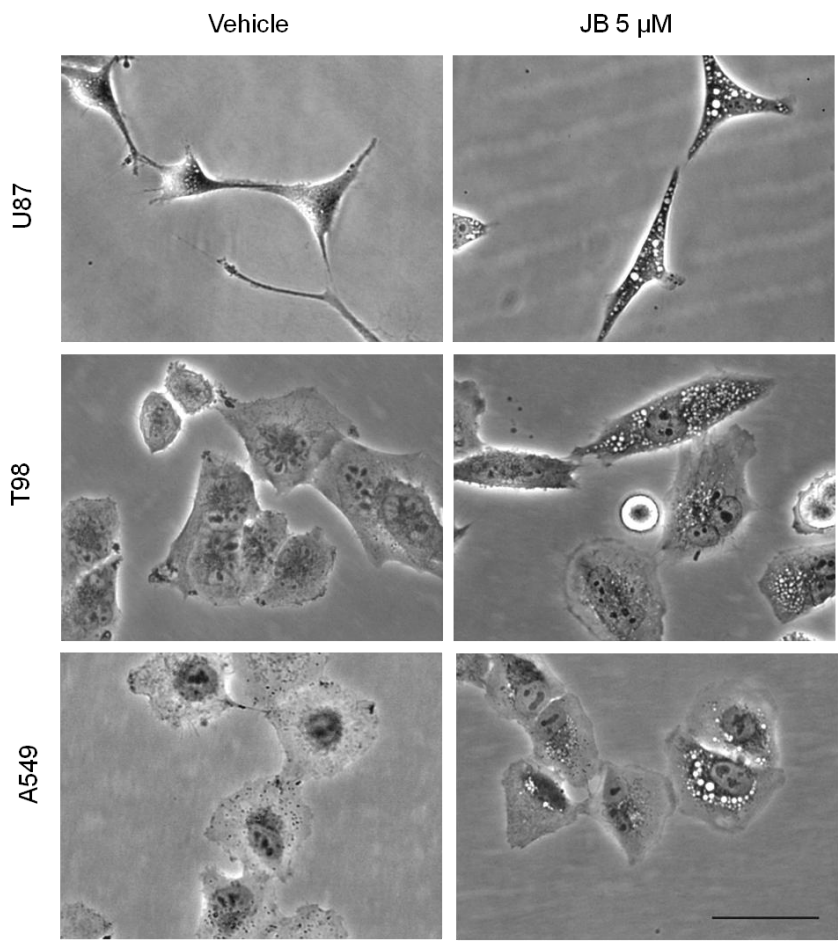

Supplemental Figure S5. JB induces cell vacuolation in various cancer cells. Phase contrast pictures of cell lines incubated with JB 5  $\mu$ M or ethanol after 4 hours (U87), 6 hours (T98) and 8 hours (A549). Images are representative of two different experiments. Scale bar: 50  $\mu$ m.

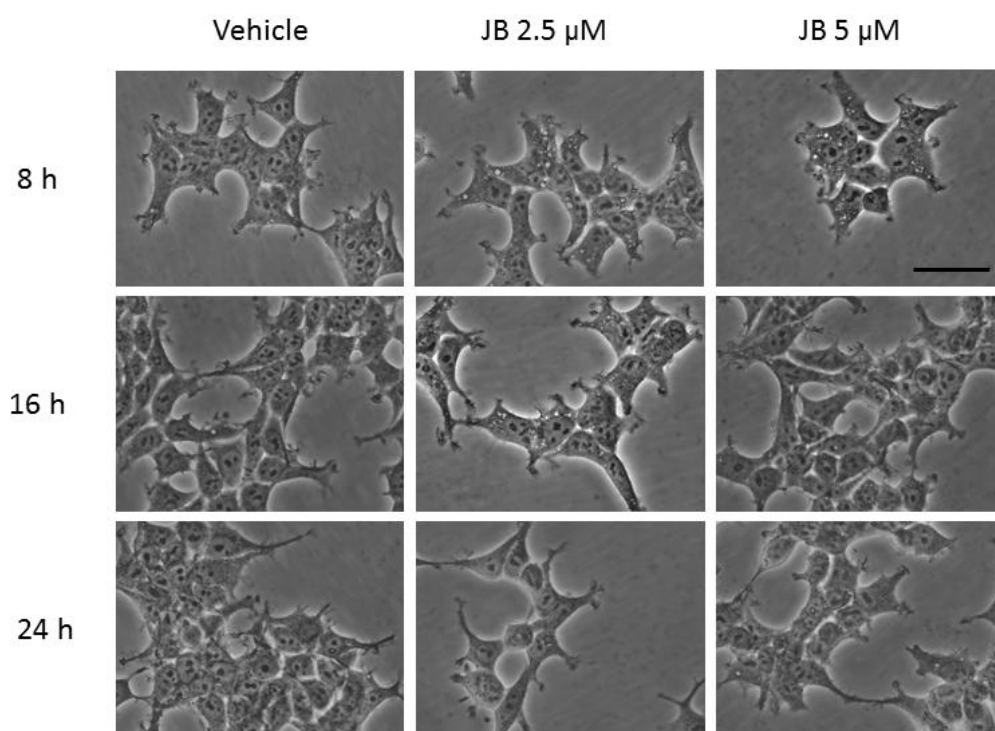

Supplemental Figure **S6**. JB does not induce cell vacuolation in HEK293T cells. Phase contrast pictures of HEK293T cells incubated with JB 2.5  $\mu\text{M}$ , 5  $\mu\text{M}$  or ethanol as a vehicle after 8 hours, 16 hours and 24 hours. Images are representative of the cell phenotype observed in two different experiments. Scale bar: 50  $\mu\text{m}$ .

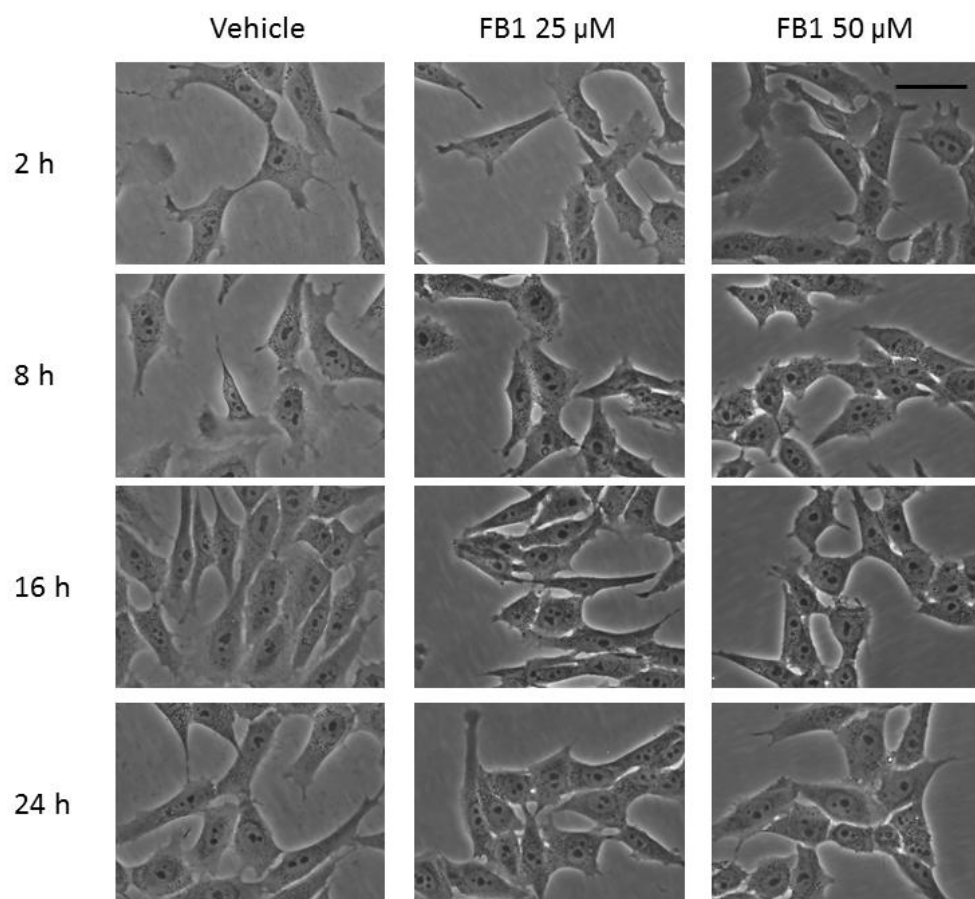

Supplemental Figure **S7**. FB1 does not induce cell vacuolation in HGC-27 cells. Phase contrast pictures of HGC-27 cells incubated with FB1 25  $\mu$ M, 50  $\mu$ M or ethanol as a vehicle after 2 hours, 8 hours, 16 hours and 24 hours. Images are representative of the cell phenotype observed in two different experiments. Scale bar: 50  $\mu$ m.



## Supplemental Experimental Procedure

Determination of *Des1* activity *in vitro* was performed as previously reported (1). For *Des1* activity determination in intact cells, cells were seeded at a density of  $2 \times 10^5$  cells/well in 6 well-plates. Twenty four hours later, the medium was removed and fresh medium containing *N*-[6-[(7-nitro-2-1,3-benzoxadiazol-4-yl)amino]hexanoyl]-*D-erythro* dihydrosphingosine (dhCerC6NBD, 10  $\mu$ M) and JB or XM462 or ethanol was added. After 4 h incubation, cells were collected and trypsinized. After adding 1 ml of methanol, 100  $\mu$ l of the cell lysate were injected into the HPLC-FD equipment. Equipment and analysis conditions were as detailed previously (1).

## Reference

1. Munoz-Olaya, J. M., X. Matabosch, C. Bedia, M. Egido-Gabás, J. Casas, A. Llebaria, A. Delgado, and G. Fabrias. 2008. Synthesis and biological activity of a novel inhibitor of dihydroceramide desaturase. *ChemMedChem* **3**:946–953.
